# Supplementary material
Source: PubMed Central journal article supplement (PMC5365349)
Supplement: NIHMS814190-supplement-Supp_info.pdf [file NIHMS814190-supplement-Supp_info.pdf]

**Table S1: List of screening strategies for participating families**

| Family   | Homozygosity mapping | Direct Sequencing* | Targeted capture | Exome sequencing |
|----------|----------------------|--------------------|------------------|------------------|
| HLRB10   | Yes                  | Yes                | -                | -                |
| HLRB2    | Yes                  | Yes                | -                | -                |
| HLRB7    | Yes                  | Yes                | -                | -                |
| HLGM05   | Yes                  | -                  | Yes              | -                |
| HLAI-20  | -                    | -                  | Yes              | -                |
| HLGM16   | -                    | -                  | Yes              | -                |
| HLAI-15  | Yes                  | -                  | Yes              | -                |
| HLAI-21  | Yes                  | -                  | Yes              | -                |
| HLAM01B  | Yes                  | -                  | -                | Yes              |
| HLAM05   | Yes                  | -                  | Yes              | Yes              |
| HLAM06   | -                    | -                  | Yes              | -                |
| HLAM10   | Yes                  | -                  | Yes              | -                |
| HLAM12A  | -                    | -                  | Yes              | Yes              |
| HLAM12B  | -                    | -                  | -                | Yes              |
| HLMI01   | Yes                  | Yes                | -                | -                |
| HLRB3    | Yes                  | Yes                | -                | -                |
| HLAI-06  | Yes                  | -                  | -                | Yes              |
| HLAM07   | -                    | -                  | Yes              | Yes              |
| HLAI-10  | -                    | -                  | -                | Yes              |
| HLAI-25  | -                    | -                  | Yes              | -                |
| HLAI-08  | Yes                  | -                  | Yes              | Yes              |
| HLAM02   | Yes                  | Yes                | -                | -                |
| HLAI-27  | -                    | -                  | Yes              | -                |
| PHLAI-01 | Yes                  | Yes                | -                | -                |
| HLAI-04  | Yes                  | Yes                | -                | -                |
| HLAI-14  | Yes                  | Yes                | -                | -                |
| HLAI-17  | Yes                  | -                  | -                | Yes              |
| HLAI-13  | -                    | -                  | Yes              | -                |
| HLAM08   | Yes                  | -                  | Yes              | -                |
| HLM1     | Yes                  | Yes                | -                | -                |
| HLMI02   | Yes                  | Yes                | -                | -                |
| HLAI-09  | Yes                  | -                  | Yes              | -                |
| HLGM14   | -                    | -                  | Yes              | -                |
| HLAI-01  | Yes                  | -                  | Yes              | -                |
| HLGM06   | Yes                  | Yes                | -                | -                |
| HLAI-07  | Yes                  | -                  | Yes              | -                |
| HLAI-19  | Yes                  | -                  | Yes              | -                |
| HLGM12   | -                    | -                  | Yes              | -                |
| HLRB5    | Yes                  | Yes                | -                | -                |
| HLAM04   | Yes                  | -                  | Yes              | -                |
| HLAM11   | -                    | -                  | Yes              | -                |
| HLRB11   | Yes                  | Yes                | -                | Yes              |
| HLAI-24  | Yes                  | -                  | Yes              | Yes              |
| HLGM24   | -                    | -                  | Yes              | -                |
| HLAI-11  | Yes                  | -                  | -                | Yes              |
| HLGM19   | -                    | -                  | Yes              | -                |
| HLAI-26  | -                    | -                  | Yes              | -                |
| HLMR3    | Yes                  | -                  | -                | Yes              |
| HLAI-16  | Yes                  | -                  | Yes              | -                |
| HLAI-18  | Yes                  | -                  | Yes              | -                |
| HLGM15   | Yes                  | Yes                | -                | -                |
| HLAI-23  | -                    | -                  | Yes              | -                |

|         |     |     |     |     |
|---------|-----|-----|-----|-----|
| HLRB6   | Yes | Yes | -   | -   |
| HLRB4   | Yes | -   | Yes | -   |
| HLGM17  | Yes | -   | -   | Yes |
| HLAI-05 | Yes | -   | -   | Yes |
| USH-1   | Yes | -   | Yes | -   |
| HLRB12  | Yes | Yes | -   | -   |
| HLRB9   | Yes | -   | -   | -   |
| HLRB13  | Yes | -   | Yes | -   |
| HLGM02  | Yes | -   | Yes | Yes |
| HLGM03  | Yes | -   | Yes | -   |
| HLGM04  | Yes | -   | -   | -   |
| HLGM07  | Yes | -   | Yes | -   |
| HLGM08  | Yes | -   | Yes | Yes |
| HLGM09  | Yes | -   | -   | -   |
| HLGM10  | Yes | -   | -   | -   |
| HLGM11  | Yes | -   | -   | -   |
| HLGM13  | Yes | -   | -   | -   |
| HLGM18  | Yes | -   | -   | -   |
| HLGM20  | Yes | -   | -   | -   |
| HLGM21  | Yes | -   | -   | -   |
| HLGM22  | Yes | -   | -   | -   |
| HLGM23  | Yes | -   | Yes | -   |
| HLGM26  | Yes | -   | -   | -   |
| HLAI-03 | Yes | -   | -   | Yes |
| HLAI-22 | Yes | -   | Yes | Yes |
| HLAM01A | Yes | -   | -   | Yes |
| HLAM03  | Yes | -   | Yes | Yes |
| IHT01A  | Yes | -   | -   | -   |
| IHT02   | Yes | -   | Yes | -   |
| HLMR1   | Yes | -   | -   | -   |
| HLMR4   | Yes | -   | -   | -   |

**Note:** *GJB2* was excluded for all families by Sanger sequencing samples from multiple affected individuals in each pedigree and therefore the nine families with *GJB2* variants are not included in the table. \*The genes implicated by homozygosity mapping were sequenced using Sanger sequencing.

**Table S2: List of genes for targeted capture and massively parallel sequencing**

| <b>Gene</b>     | <b>Inheritance</b> | <b>Gene</b>     | <b>Inheritance</b> | <b>Gene</b>    | <b>Inheritance</b>     |
|-----------------|--------------------|-----------------|--------------------|----------------|------------------------|
| <i>ACTG1</i>    | Dominant           | <i>OTOG</i>     | Recessive          | <i>SLITRK6</i> | Recessive              |
| <i>CCDC50</i>   | Dominant           | <i>ELMOD3</i>   | Recessive          | <i>SUN1</i>    | Recessive              |
| <i>CEACAM16</i> | Dominant           | <i>ESRRB</i>    | Recessive          | <i>SYNE4</i>   | Recessive              |
| <i>CHD7</i>     | Dominant           | <i>GIPC3</i>    | Recessive          | <i>VEZT</i>    | Recessive              |
| <i>COCH</i>     | Dominant           | <i>GJB6</i>     | Recessive          | <i>CDH23</i>   | Recessive              |
| <i>COL11A1</i>  | Dominant           | <i>GPR98</i>    | Recessive          | <i>CIB2</i>    | Recessive              |
| <i>CRYM</i>     | Dominant           | <i>GPSM2</i>    | Recessive          | <i>CLDN14</i>  | Recessive              |
| <i>DIAPH3</i>   | Dominant           | <i>GRXCR1</i>   | Recessive          | <i>CLRN1</i>   | Recessive              |
| <i>DFNA5</i>    | Dominant           | <i>HGF</i>      | Recessive          | <i>COL4A4</i>  | Recessive              |
| <i>DIABLO</i>   | Dominant           | <i>ILDR1</i>    | Recessive          | <i>EPS8</i>    | Recessive              |
| <i>DIAPH1</i>   | Dominant           | <i>KARS</i>     | Recessive          | <i>ADCY1</i>   | Recessive              |
| <i>DSPP</i>     | Dominant           | <i>KCNQ1</i>    | Recessive          | <i>MYO6</i>    | Recessive and dominant |
| <i>EYA1</i>     | Dominant           | <i>LOXHD1</i>   | Recessive          | <i>MYO7A</i>   | Recessive and dominant |
| <i>EYA4</i>     | Dominant           | <i>LRTOMT</i>   | Recessive          | <i>TECTA</i>   | Recessive and dominant |
| <i>GRHL2</i>    | Dominant           | <i>MARVELD2</i> | Recessive          | <i>TMC1</i>    | Recessive and dominant |
| <i>KCNQ4</i>    | Dominant           | <i>MSRB3</i>    | Recessive          | <i>WFS1</i>    | Recessive and dominant |
| <i>MIR96</i>    | Dominant           | <i>MYO15A</i>   | Recessive          | <i>COL11A2</i> | Recessive and dominant |
| <i>MYH14</i>    | Dominant           | <i>MYO3A</i>    | Recessive          | <i>COL2A1</i>  | Recessive and dominant |
| <i>MYH9</i>     | Dominant           | <i>OTOA</i>     | Recessive          | <i>COL4A3</i>  | Recessive and dominant |
| <i>MYO1A</i>    | Dominant           | <i>OTOF</i>     | Recessive          | <i>ESPN</i>    | Recessive and dominant |
| <i>PAX3</i>     | Dominant           | <i>PCDH15</i>   | Recessive          | <i>GJB2</i>    | Recessive and dominant |
| <i>POU4F3</i>   | Dominant           | <i>PDZD7</i>    | Recessive          | <i>ABCA13</i>  | Unknown                |
| <i>SEMA3E</i>   | Dominant           | <i>PJKK</i>     | Recessive          | <i>COL4A5</i>  | X-linked               |
| <i>SIX1</i>     | Dominant           | <i>PTPRQ</i>    | Recessive          | <i>COL4A6</i>  | X-linked               |
| <i>SIX5</i>     | Dominant           | <i>RDX</i>      | Recessive          | <i>NDP</i>     | X-linked               |
| <i>SLC17A8</i>  | Dominant           | <i>SERPINB6</i> | Recessive          | <i>PRPS1</i>   | X-linked               |
| <i>SNAI2</i>    | Dominant           | <i>STRC</i>     | Recessive          | <i>SMPX</i>    | X-linked               |
| <i>SOX10</i>    | Dominant           | <i>TMIE</i>     | Recessive          |                |                        |
| <i>TCOF1</i>    | Dominant           | <i>TMPRSS3</i>  | Recessive          |                |                        |
| <i>TJP2</i>     | Dominant           | <i>TPRN</i>     | Recessive          |                |                        |
| <i>ATP2B2</i>   | Recessive          | <i>TRIOBP</i>   | Recessive          |                |                        |
| <i>BSND</i>     | Recessive          | <i>USH1C</i>    | Recessive          |                |                        |
| <i>COL9A1</i>   | Recessive          | <i>USH1G</i>    | Recessive          |                |                        |
| <i>DFNB59</i>   | Recessive          | <i>USH2A</i>    | Recessive          |                |                        |
| <i>EDN3</i>     | Recessive          | <i>WHRN</i>     | Recessive          |                |                        |
| <i>EDNRB</i>    | Recessive          | <i>OTOGL</i>    | Recessive          |                |                        |
| <i>ERCC6</i>    | Recessive          | <i>PNPT1</i>    | Recessive          |                |                        |
| <i>FGF3</i>     | Recessive          | <i>SIPR2</i>    | Recessive          |                |                        |
| <i>KCNE1</i>    | Recessive          | <i>SLC26A4</i>  | Recessive          |                |                        |
| <i>LHFPL5</i>   | Recessive          | <i>SLC26A5</i>  | Recessive          |                |                        |

**Table S3: List of samples chosen for massively parallel sequencing and the implicated genes**

| Family  | Samples | Target Capture | Exome | Gene ID        | Locus Heterogeneity |
|---------|---------|----------------|-------|----------------|---------------------|
| HLGM05  | 1       | Yes            | -     | <i>SLC26A4</i> | -                   |
| HLAI-20 | 1       | Yes            | -     | <i>SLC26A4</i> | -                   |
| HLGM16  | 1       | Yes            | -     | <i>SLC26A4</i> | -                   |
| HLAM01B | 1       | -              | Yes   | <i>SLC26A4</i> | Yes                 |
| HLAM06  | 1       | Yes            | -     | <i>SLC26A4</i> | -                   |
| HLAM10  | 1       | Yes            | -     | <i>SLC26A4</i> | -                   |
| HLAM12A | 1       | -              | Yes   | <i>SLC26A4</i> | Yes                 |
| HLAM05  | 1       | Yes            | Yes   | <i>MYO15A</i>  | -                   |
| HLAI-06 | 3       | -              | Yes   | <i>MYO15A</i>  | -                   |
| HLAM07  | 1       | Yes            | -     | <i>MYO15A</i>  | -                   |
| HLAI-10 | 3       | -              | Yes   | <i>MYO15A</i>  | -                   |
| HLAI-25 | 1       | Yes            | -     | <i>MYO15A</i>  | -                   |
| HLAI-08 | 1       | Yes            | -     | -              | -                   |
| HLAI-27 | 1       | Yes            | -     | <i>TMC1</i>    | -                   |
| HLAI-17 | 3       | -              | Yes   | -              | -                   |
| HLAI-13 | 1       | Yes            | -     | <i>TMPRSS3</i> | -                   |
| HLAM08  | 1       | Yes            | -     | <i>TMPRSS3</i> | -                   |
| HLAI-09 | 1       | -              | Yes   | <i>OTOF</i>    | -                   |
| HLGM14  | 1       | Yes            | -     | <i>OTOF</i>    | -                   |
| HLAI-01 | 1       | -              | Yes   | <i>OTOF</i>    | -                   |
| HLAI-07 | 1       | Yes            | -     | -              | -                   |
| HLAI-19 | 1       | -              | Yes   | <i>MYO7A</i>   | -                   |
| HLGM12  | 1       | Yes            | -     | <i>MYO7A</i>   | -                   |
| HLAM04  | 1       | Yes            | -     | <i>CLDN14</i>  | -                   |
| HLAM11  | 1       | Yes            | -     | <i>CLDN14</i>  | -                   |
| HLGM24  | 1       | Yes            | -     | <i>CDH23</i>   | -                   |
| HLAI-11 | 1       | -              | Yes   | <i>GIPC3</i>   | -                   |
| HLGM19  | 1       | Yes            | -     | <i>TECTA</i>   | -                   |
| HLAI-26 | 1       | Yes            | -     | <i>TRIOBP</i>  | -                   |
| HLMR3   | 1       | -              | Yes   | <i>ESPN</i>    | Yes                 |
| HLAI-16 | 1       | -              | Yes   | <i>MYO6</i>    | -                   |
| HLAI-18 | 1       | Yes            | -     | <i>HGF</i>     | Yes                 |
| HLAI-23 | 1       | Yes            | -     | <i>BSND</i>    | -                   |
| HLRB4   | 1       | Yes            | -     | <i>PTPRQ</i>   | -                   |
| HLGM17  | 1       | -              | Yes   | <i>MET</i>     | -                   |
| HLAI-05 | 1       | -              | Yes   | <i>GRXCR2</i>  | Yes                 |
| USH-1   | 1       | Yes            | -     | <i>USH1C</i>   | -                   |
| HLRB11  | 1       | -              | -     | -              | -                   |
| HLRB13  | 1       | Yes            | -     | -              | -                   |

|         |   |     |     |   |     |
|---------|---|-----|-----|---|-----|
| HLGM02  | 2 | Yes | Yes | - | -   |
| HLGM03  | 1 | Yes | -   | - | -   |
| HLGM07  | 1 | Yes | -   | - | -   |
| HLGM08  | 3 | Yes | Yes | - | -   |
| HLGM23  | 1 | Yes | -   | - | -   |
| HLAI-03 | 1 | -   | Yes | - | -   |
| HLAI-22 | 3 | Yes | Yes | - | -   |
| HLAI-24 | 1 | Yes | Yes | - | -   |
| HLAM01A | 1 | -   | Yes | - | -   |
| HLAM03  | 3 | -   | Yes | - | -   |
| HLAM12B | 2 | -   | Yes | - | Yes |
| IHT02   | 1 | Yes | -   | - | -   |

**Table S4: References for the identified mutations**

| Gene                            | Family ID | Variant                                   | Reference PMID |
|---------------------------------|-----------|-------------------------------------------|----------------|
| <i>SLC26A4</i><br>NM_000441.1   | HLRB10    | c.170C>A:p.(Ser57X)                       | 12676893       |
|                                 | HLRB2     | c.716T>A:p.(Val239Asp)                    | 12676893       |
|                                 | HLRB7     | c.716T>A:p.(Val239Asp)                    | 12676893       |
|                                 | HLGM05    | c.716T>A:p.(Val239Asp)                    | 12676893       |
|                                 | HLAI-20   | c.716T>A:p.(Val239Asp)                    | 12676893       |
|                                 | HLGM16    | c.965dupA:p.N322KfsX8                     | 18813951       |
|                                 | HLAI-15   | c.1337A>G:p.(Gln446Arg)                   | 10700480       |
|                                 | HLAI-21   | c.1337A>G:p.(Gln446Arg)                   | 10700480       |
|                                 | HLAM01B   | c.1337A>G:p.(Gln446Arg)                   | 10700480       |
|                                 | HLAM06    | c.1337A>G:p.(Gln446Arg)                   | 10700480       |
|                                 | HLAM10    | c.1337A>G:p.(Gln446Arg)                   | 10700480       |
|                                 | HLAM12A   | c.1667A>G:p.(Tyr556Cys)                   | 9618167        |
|                                 | HLAM12B   | c.1667A>G:p.(Tyr556Cys)                   | 9618167        |
| <i>GJB2</i><br>NM_004004.5      | HLAI-02   | c.71G>A:p.(Trp24X)                        | 9139825        |
|                                 | HLAI-12   | c.71G>A:p.(Trp24X)                        | 9139825        |
|                                 | HLGM25    | c.71G>A:p.(Trp24X)                        | 9139825        |
|                                 | HLMS16    | c.71G>A:p.(Trp24X)                        | 9139825        |
|                                 | HLMS34    | c.71G>A:p.(Trp24X)                        | 9139825        |
|                                 | HLRB1     | c.231G>A:p.(Trp77X)                       | 9139825        |
|                                 | HLRB8     | c.71G>A/c.231G>A<br>p.(Trp24X)/p.(Trp77X) | 9139825        |
|                                 | HLAM09    | c.71G>A/c.231G>A<br>p.(Trp24X)/p.(Trp77X) | 9139825        |
|                                 | HLMR2     | c.358_360 del: p.(Glu120del)              | 15967879       |
| <i>MYO15A</i><br>NM_016239.3    | HLRB3     | c.1185dupC: p.(Glu396ArgfsX36)*           | 22245518       |
|                                 | HLAM05    | c.1657delC:p.(Arg553GlyfsX76)             | This report    |
|                                 | HLAI-06   | c.2456C>A:p.(Ser819X)                     | This report    |
|                                 | HLAM07    | c.3866+1G>A                               | 17546645       |
|                                 | HLAI-10   | c.6589C>T:p.(Gln2197X)                    | 27375115       |
|                                 | HLAI-25   | c.8158G>A:p.(Asp2720Asn)                  | This report    |
| <i>TMC1</i><br>NM_138691.1      | HLAM02    | c.100C>T:p.(Arg34X)                       | 11850618       |
|                                 | HLAI-27   | c.596A>T:p.(Asn199Ile)*                   | 26879195       |
|                                 | PHLAI-01  | c.1166G>A:p.(Arg389Gln)                   | 18985073       |
|                                 | HLAI-04   | c.1404+1G>T*                              | 26879195       |
|                                 | HLAI-14   | c.1788C>A:p.(Ser596Arg)*                  | 26879195       |
| <i>TMPRSS3</i><br>NM_00024022.2 | HLAI-13   | c.208delC:p.(His70ThrfsX19)               | 11907649       |
|                                 | HLAM08    | c.1219T>C:p.(Cys407Arg)                   | 11424922       |
|                                 | HLM1      | c.323-6 G>A:p.(Val108AlafsX132)           | 11137999       |
|                                 | HLM102    | c.323-6 G>A:p. Val108AlafsX132)           | 11137999       |
| <i>OTOF</i><br>NM_194248.2      | HLAI-09   | c.2965_2967del:p.(Phe989del)              | This report    |
|                                 | HLGM14    | c.3289-1G>T                               | This report    |
|                                 | HLAI-01   | c.4805G>T:p.(Gly1602Val)                  | This report    |
| <i>MYO7A</i><br>NM_000260.3     | HLAI-19   | c.1183C>T:p.(Arg395Cys)                   | This report    |
|                                 | HLGM12    | c.6354G>C:p.(Lys2118Asn)                  | This report    |
| <i>CLDN14</i><br>NM_144492.2    | HLRB5     | c.254T>A:p.(Val85Asp)                     | 11163249       |
|                                 | HLAM04    | c.254T>A: p.(Val85Asp)                    | 11163249       |
|                                 | HLAM11    | c.254T>A: p.(Val85Asp)                    | 11163249       |
| <i>CDH23</i><br>NM_022124.5     | HLGM24    | c.7814A>G:p.(Asn2605Ser)                  | This report    |
|                                 |           |                                           |                |
| <i>GIPC3</i><br>NM_133261.2     | HLAI-11   | c.662C>T:p.(Thr221Ile)                    | 21660509       |

|                                 |         |                                      |             |
|---------------------------------|---------|--------------------------------------|-------------|
| <i>TECTA</i><br>NM_005422.2     | HLGM19  | c.64+2T>C                            | This report |
| <i>TRIOBP</i><br>NM_001039141.2 | HLAI-26 | c.2968C>T:p.(Arg990X)                | This report |
| <i>ESPN</i><br>NM_031475.2      | HLMR3   | c.2019dupG:p.(Leu674AlafsX72)        | This report |
| <i>MYO6</i><br>NM_004999.3      | HLAI-16 | c.1729_1741del:p.(Phe577IlefsX28)    | This report |
| <i>HGF</i><br>NM_000601.4       | HLAI-18 | c.482+1986_1988delTGA                | 19576567    |
| <i>DFNB59</i><br>NM_001042702.3 | HLGM15  | c.1028G>C:p.(Cys343Ser)*             | 22617256    |
| <i>BSND</i><br>NM_057176.2      | HLAI-23 | c.35 T>C:p.(Ile12Thr)                | 19646679    |
| <i>TPRN</i><br>NM_001128228.1   | HLRB6   | c.42_52del11:p.(Gly15AlafsX150)      | 20170899    |
| <i>PTPRQ</i><br>NM_001145026.1  | HLRB4   | c.189delC:p.(Glu65LysfsX95)          | This report |
| <i>MET</i><br>NM_000245.2       | HLGM17  | c.2521T>G:p.(Phe841Val)*             | 25941349    |
| <i>GRXCR2</i><br>NM_001080516.1 | HLAI-05 | c.714dupT:p.(Gly239TrpfsX74)*        | 24619944    |
| <i>USH1C</i><br>NM_005709.3     | USH-1   | c.605dupC:p.(Gly203TrpfsX47)         | This report |
| <i>USH1G</i><br>NM_173477.4     | HLRB12  | c.163_164+13del15:p.(Gly55GlyfsX56)* | 20811388    |

\*These variants were first identified segregating with hearing loss in members of families in this cohort and were reported previously by us. PMID; PubMed-Indexed for MEDLINE (<http://www.ncbi.nlm.nih.gov/pubmed>).

**Table S5: Pathogenic variants and their allele frequencies**

| Locus/Gene                               | Variant                        | dbSNP              | Frequency   | Reference PMID |
|------------------------------------------|--------------------------------|--------------------|-------------|----------------|
| <i>DFNB4/SLC26A4</i><br>NM_000441.1      | c.170C>A:p.(Ser57X)            | <i>rs111033200</i> | 0.000008236 | 12676893       |
|                                          | c.716T>A:p.(Val239Asp)         | <i>rs111033256</i> | 0.0002389   | 12676893       |
|                                          | c.1337A>G:p.(Gln446Arg)        | <i>rs768471577</i> | 0.00008259  | 10700480       |
|                                          | c.1667A>G:p.(Tyr556Cys)        | <i>rs763006761</i> | 0.00002487  | 9618167        |
| <i>DFNB1/GJB2</i><br>NM_004004.5         | c.71G>A:p.(Trp24X)             | <i>rs104894396</i> | 0.0005767   | 9139825        |
|                                          | c.231G>A:p.(Trp77X)            | <i>rs80338944</i>  | 0.0001483   | 9139825        |
|                                          | c.358_360 del: p.(Glu120del)   | <i>rs80338947</i>  | 0.00006589  | 10544226       |
| <i>DFNB3/MYO15A</i><br>NM_016239.3       | c.1657delC:p.(Arg553GlyfsX76)* | <i>rs750651809</i> | 0.00000864  | This report    |
|                                          | c.3866+1G>A                    | <i>rs374742590</i> | 0.000083    | 17546645       |
| <i>DFNB7/TMC1</i><br>NM_138691.1         | c.100C>T:p.(Arg34X)            | <i>rs121908073</i> | 0.00005242  | 11850618       |
|                                          | c.596A>T:p.(Asn199Ile)*        | <i>rs141523206</i> | 0.000008237 | 26879195       |
|                                          | c.1166G>A:p.(Arg389Gln)        | <i>rs772640673</i> | 0.00001648  | 18616530       |
| <i>DFNB8/TMPRSS3</i><br>NM_00024022.2    | c.208delC:p.(His70ThrfsX19)    | <i>rs727503493</i> | 0.0004412   | 11907649       |
|                                          | c.1219T>C:p.(Cys407Arg)        | <i>rs773780151</i> | 0.00004954  | 11424922       |
| <i>DFNB29/CLDN14</i><br>NM_144492.2      | c.254T>A:p.(Val85Asp)          | <i>rs74315437</i>  | 0.000008385 | 11163249       |
| <i>DFNB12/USH1D/CDH23</i><br>NM_022124.5 | c.7814A>G:p.(Asn2605Ser)*      | <i>rs780917129</i> | 0.00005447  | This report    |
| <i>DFNB15/72/95/GIPC3</i><br>NM_133261.2 | c.662C>T:p.(Thr221Ile)         | <i>rs761543680</i> | 0.00004152  | 21660509       |
| <i>DFNB59/DFNB59</i><br>NM_001042702.3   | c.1028G>C:p.(Cys343Ser)*       | <i>rs569088856</i> | 0.00003315  | 22617256       |
| <i>DFNB73/BSND</i><br>NM_057176.2        | c.35 T>C:p.(Ile12Thr)          | <i>rs121908144</i> | 0.00002473  | 19646679       |
| <i>DFNB84/PTPRQ</i><br>NM_001145026.1    | c.189delC:p.(Glu65LysfsX95)*   | <i>rs773511370</i> | 0.00005612  | This report    |

All allele frequencies are reported from exome aggregation consortium ExAC, (<http://exac.broadinstitute.org/>), except *MYO15A* c.3866+1G>A, which comes from the NHLBI Exome Sequencing Project database (<http://evs.gs.washington.edu/EVS/>). dbSNP, database of single nucleotide polymorphisms (<http://www.ncbi.nlm.nih.gov/snp/>); HL, hearing loss; References to the first description of the mutation in literature describing association with hearing loss are provided as PMID; PubMed-Indexed for MEDLINE (<http://www.ncbi.nlm.nih.gov/pubmed>). \* Previously not known to cause hearing loss; co-segregation with HL phenotype demonstrated in participating families of this cohort.



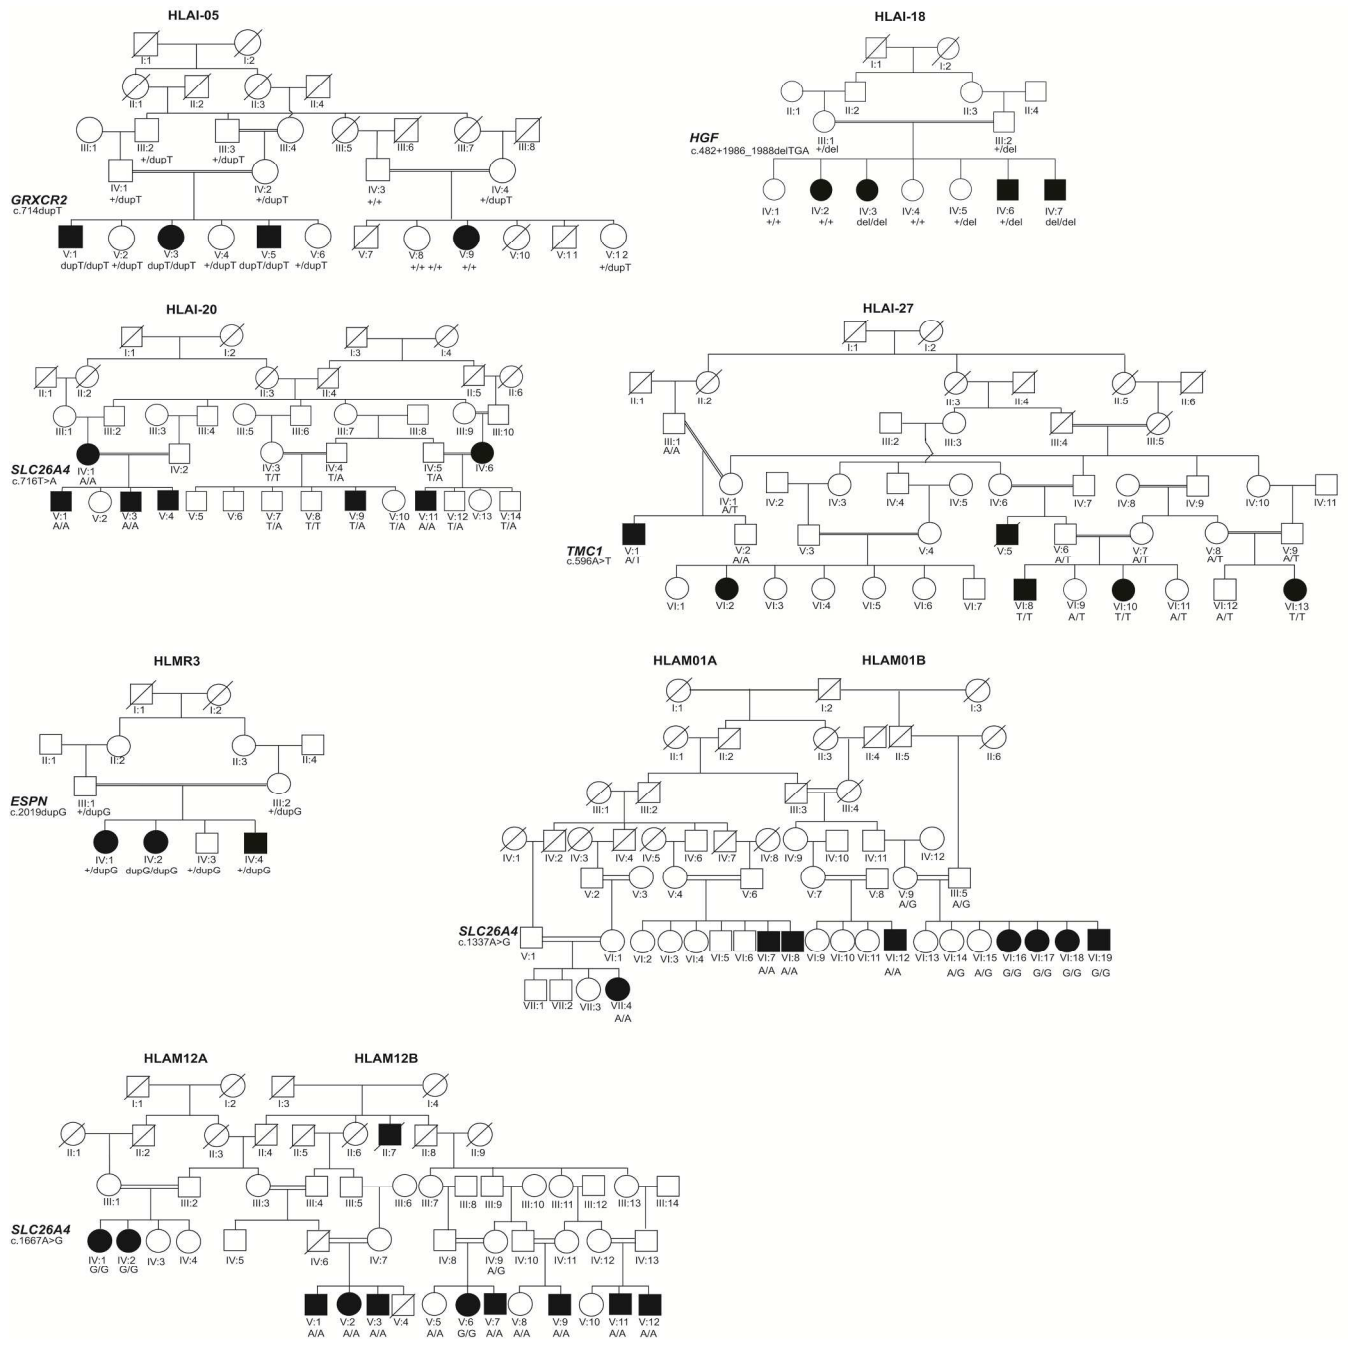

**Fig. S1.** Pedigrees of families exhibiting genetic heterogeneity. Genotypes are shown for variants in respective genes for all participants

## RESULTS

### Novel variants and hearing loss

Novel variants of *MYO15A* (OMIM 602666) contributed to hearing loss in four families. Three of these mutations create premature stop codons within exon 2 (1) (Table 1) and are predicted to result only in the loss of isoform 1 of *MYO15A* (2). A new missense mutation in exon 44, c.8158G>A, p.D2720N was identified in family HLAI-25. A previously observed variant causing profound deafness in Pakistan changed the evolutionary conserved p.Asp2720 (Fig. 2) to histidine (3).

Novel pathogenic variants in *OTOF* (OMIM 603681) were identified in three families segregating moderate or severe hearing loss. These included an in-frame deletion, a missense mutation and a splice site variant. The in-frame deletion is predicted to remove a conserved amino acid (Fig. 2) while p.(Gly1602Val) substitutes an evolutionary conserved glycine with a valine (Fig. 2). The splice site mutation, c.3989-1G>T is predicted to cause skipping of exon 27 which will delete 40 codons and remove 40 residues in-frame from the mature protein.

We identified two novel variants, c.1183C>T, p.(Arg395Cys) and c.6354G>C, p.(Lys2118Asn) in *MYO7A* (OMIM 276903) which are substitutions of conserved residues of myosin 7A (Fig. 2). The mutations co-segregated with severe hearing loss which was progressive for HLAI-19. The p.(Arg395Cys) affects the same residue that is mutated to histidine and is associated with moderate or severe to profound hearing loss in an Iranian family (4). The affected individuals who were homozygous for p.(Arg395Cys) in Pakistani family HLAI-19 had no manifestations of retinitis pigmentosa even at the age of 45 years. However, in the second decade of life one

affected member of family HLG12 segregating a p.(Lys211Asn) allele reported night vision loss, and thus this mutation is associated with Usher syndrome type 1B (OMIM 276900).

A family with predominantly moderate or severe hearing loss had a novel homozygous missense mutation c.7949A>G, p.(Asn2655Ser) which affects a conserved residue in CDH23 (Fig. 2).

**CDH23** (OMIM 605516) variants cause severe to profound deafness with few exceptions. In some individuals with compound heterozygous mutations, hearing loss was moderate to severe (5) and two individuals homozygous for the p.(Phe1888Ser) allele of *CDH23* had normal hearing at low frequencies (6).

The pathogenic variants c.2968C>T,p.(Arg990X), c.2019dupG,p.(Leu674AlafsX72), c.1729\_1741del,p.(Phe577IlefsX28) of *TRIOBP* (OMIM 609761), *ESPN* (OMIM 606351), and *MYO6* (OMIM 600970) respectively, link these genes for the first time as cause of moderate to severe hearing loss. All three variants are predicted to be null alleles and previous recessive mutations of these genes have been associated with profound deafness (7-9).

Novel mutations were identified in *TECTA* (OMIM 602574) c.64+2T>C, *PTPRQ* (OMIM 603317) c.189delC,p.(Glu65LysfsX95) and *USH1C* (OMIM 605242) c.605dupC,p.(Gly203TrpfsX47). The variant of *TECTA* is located in the first intron and is therefore likely to result in loss of gene transcription due to failure of recognition of the first exon, or altered frame due to retention of intron or use of cryptic splice sites (10, 11). Both variants in *PTPRQ* and *USH1C* are frameshifting and are expected to lead to null alleles via nonsense mediated decay of the transcripts.

Novel variants of *DFNB59* (OMIM 610219), *USH1G* (OMIM 607696) and *TMCI* (OMIM 606706) were previously described by us (12-14).

### **Known variants and hearing loss**

Two mutant alleles (p.(Trp24X) and p.(Trp77X) of *GJB2* (OMIM 121011) accounted for hearing loss in eight families in this cohort (15) while the affected individuals in the ninth family were homozygous for another variant p.(Glu120del). The p.(Trp24X) and p.(Trp77X) variants have been reported to cause profound deafness in hundreds of individuals of South Asian descent (16-19). However, the p.(Glu120del) variant was reported as a compound heterozygous mutation in one individual (20) and is annotated as a variant of unknown significance in the Human Gene Mutation Database (HGMD, <http://www.hgmd.cf.ac.uk/>, accessed June 2016).

We identified two known variants in *MYO15A*. The variant c.3866+1G>A at the donor splice site of exon 5 observed in family HLAM07 in this study was previously reported in two families from Pakistan with profound deafness (3, 19). We observed a nonsense mutation c.6589 C>T, p.Q2197X in exon 31 of *MYO15A* in family HLAI-10 which has four affected members. One individual in this family has a severe hearing loss (PTA 83 dB HL). This mutation has also been observed in two families from Pakistan (21), however audiometric data was not available for comparison.

We found three known variants in *TMPRSS3* (OMIM 605511). In family HLAI-13 segregating a frameshift mutation c.208delC, p.(His70ThrfsX19) and in family HLAM08 segregating a missense p.(Cys407Arg) variant affecting *TMPRSS3*, a moderate to severe hearing loss was

observed in most affected members. This is in contrast to the profound deafness manifested by the affected individuals due to homozygosity of these same alleles as reported in other studies (22-24). In addition, the hearing loss in two families HLM1 and HLMI02 was due to a cryptic acceptor splice site variant (25) of *TMPRSS3* in intron 4 (Table 1). In family HLM1, a similar childhood onset hearing loss, progressing to profound deafness by the second decade of life was present as that reported in another family with the same mutation (25), while in family HLMI02 hearing loss was of childhood onset (3-4 years) and the degree was moderate or severe at the age of 22 years.

We identified one missense variant of *CLDN14* (OMIM 605608) which caused the phenotype in three families. Our audiometric findings for family HLRB5 (26) and two other families (Table 1) demonstrated that hearing loss can vary in severity due to *CLDN14* mutations, an observation supported by other studies (27, 28).

In two affected individuals with progressive and moderate to severe hearing loss of family HLAI-18, we found a variant of *HGF* (OMIM 142409) which segregated with progressive and severe hearing loss (73 dB HL). This same variant was previously reported to cause profound deafness in other affected individuals from Pakistan (29).

The known variants of *GIPC3* (OMIM 608792) and *BSND* (OMIM 606412) were identified in two families (Table 1) which segregated with similar progressive or moderate to severe phenotype as manifested by other families with the identical mutations (30, 31).

The progressive, moderate to severe hearing loss of family HLRB6 with a known *TPRN* (OMIM 613354) variant was previously described by us (32).

### **Supplementary References**

1. Bashir R, Fatima A, Naz S. Prioritized sequencing of the second exon of *MYO15A* reveals a new mutation segregating in a Pakistani family with moderate to severe hearing loss. *Eur J Med Genet* 2012; 55: 99-102.
2. Liang Y, Wang A, Belyantseva IA et al. Characterization of the human and mouse unconventional myosin XV genes responsible for hereditary deafness *DFNB3* and *shaker 2*. *Genomics* 1999; 61: 243-258.
3. Nal N, Ahmed ZM, Erkal E et al. Mutational spectrum of *MYO15A*: the large N-terminal extension of myosin XVA is required for hearing. *Hum Mutat* 2007; 28: 1014-1019.
4. Hildebrand MS, Thorne NP, Bromhead CJ et al. Variable hearing impairment in a *DFNB2* family with a novel *MYO7A* missense mutation. *Clin Genet* 2010; 77: 563-571.
5. Astuto LM, Bork JM, Weston MD et al. *CDH23* mutation and phenotype heterogeneity: a profile of 107 diverse families with Usher syndrome and nonsyndromic deafness. *Am J Hum Genet* 2002; 71: 262-275.
6. Schultz JM, Yang Y, Caride AJ et al. Modification of human hearing loss by plasma-membrane calcium pump *PMCA2*. *N Engl J Med* 2005; 352: 1557-1564.
7. Ahmed ZM, Morell RJ, Riazuddin S et al. Mutations of *MYO6* are associated with recessive deafness, *DFNB37*. *Am J Hum Genet* 2003; 72: 1315-1322.
8. Naz S, Griffith AJ, Riazuddin S et al. Mutations of *ESPN* cause autosomal recessive deafness and vestibular dysfunction. *J Med Genet* 2004; 41: 591-595.

9. Riazuddin S, Khan SN, Ahmed ZM et al. Mutations in TRIOBP, which encodes a putative cytoskeletal-organizing protein, are associated with nonsyndromic recessive deafness. *Am J Hum Genet* 2006; 78: 137-143.
10. Bruzzone R, Veronesi V, Gomes D et al. Loss-of-function and residual channel activity of connexin26 mutations associated with non-syndromic deafness. *FEBS Lett* 2003; 533: 79-88.
11. Gonzalez AA, Reyes ML, Carvajal CA et al. Congenital lipoid adrenal hyperplasia caused by a novel splicing mutation in the gene for the steroidogenic acute regulatory protein. *J Clin Endocrinol Metab* 2004; 89: 946-951.
12. Bashir R, Fatima A, Naz S. A frameshift mutation in SANS results in atypical Usher syndrome. *Clin Genet* 2010; 78: 601-603.
13. Mujtaba G, Bukhari I, Fatima A et al. A p.C343S missense mutation in PJKV causes progressive hearing loss. *Gene* 2012; 504: 98-101.
14. Imtiaz A, Maqsood A, Rehman AU et al. Recessive mutations of TMC1 associated with moderate to severe hearing loss. *Neurogenetics* 2016; 17: 115-123.
15. Salman M, Bashir R, Imtiaz A et al. Mutations of GJB2 encoding connexin 26 contribute to non-syndromic moderate and severe hearing loss in Pakistan. *Eur Arch Otorhinolaryngol* 2015; 272: 2071-2075.
16. Kelsell DP, Dunlop J, Stevens HP et al. Connexin 26 mutations in hereditary non-syndromic sensorineural deafness. *Nature* 1997; 387: 80-83.
17. Riazuddin S, Belyantseva IA, Giese AP et al. Alterations of the CIB2 calcium- and integrin-binding protein cause Usher syndrome type 1J and nonsyndromic deafness DFNB48. *Nat Genet* 2012; 44: 1265-1271.

18. Santos RL, Wajid M, Pham TL et al. Low prevalence of Connexin 26 (GJB2) variants in Pakistani families with autosomal recessive non-syndromic hearing impairment. *Clin Genet* 2005; 67: 61-68.
19. Shafique S, Siddiqi S, Schraders M et al. Genetic spectrum of autosomal recessive non-syndromic hearing loss in Pakistani families. *PLoS One* 2014; 9: e100146.
20. Murgia A, Orzan E, Polli R et al. Cx26 deafness: mutation analysis and clinical variability. *J Med Genet* 1999; 36: 829-832.
21. Rehman AU, Bird JE, Faridi R et al. Mutational Spectrum of MYO15A and the Molecular Mechanisms of DFNB3 Human Deafness. *Hum Mutat* 2016.
22. Ben-Yosef T, Wattenhofer M, Riazuddin S et al. Novel mutations of TMPRSS3 in four DFNB8/B10 families segregating congenital autosomal recessive deafness. *J Med Genet* 2001; 38: 396-400.
23. Wattenhofer M, Di Iorio MV, Rabionet R et al. Mutations in the TMPRSS3 gene are a rare cause of childhood nonsyndromic deafness in Caucasian patients. *J Mol Med (Berl)* 2002; 80: 124-131.
24. Weegerink NJ, Schraders M, Oostrik J et al. Genotype-phenotype correlation in DFNB8/10 families with TMPRSS3 mutations. *J Assoc Res Otolaryngol* 2011; 12: 753-766.
25. Scott HS, Kudoh J, Wattenhofer M et al. Insertion of beta-satellite repeats identifies a transmembrane protease causing both congenital and childhood onset autosomal recessive deafness. *Nat Genet* 2001; 27: 59-63.
26. Bashir R, Fatima A, Naz S. Mutations in CLDN14 are associated with different hearing thresholds. *J Hum Genet* 2010; 55: 767-770.



27. Lee K, Ansar M, Andrade PB et al. Novel CLDN14 mutations in Pakistani families with autosomal recessive non-syndromic hearing loss. *Am J Med Genet A* 2012; 158A: 315-321.
28. Bashir ZE, Latief N, Belyantseva IA et al. Phenotypic variability of CLDN14 mutations causing DFNB29 hearing loss in the Pakistani population. *J Hum Genet* 2013; 58: 102-108.
29. Schultz JM, Khan SN, Ahmed ZM et al. Noncoding mutations of HGF are associated with nonsyndromic hearing loss, DFNB39. *Am J Hum Genet* 2009; 85: 25-39.
30. Charizopoulou N, Lelli A, Schraders M et al. Gipc3 mutations associated with audiogenic seizures and sensorineural hearing loss in mouse and human. *Nat Commun* 2011; 2: 201.
31. Riazuddin S, Anwar S, Fischer M et al. Molecular basis of DFNB73: mutations of BSND can cause nonsyndromic deafness or Bartter syndrome. *Am J Hum Genet* 2009; 85: 273-280.
32. Bashir R, Imtiaz A, Fatima A et al. The c.42\_52del11 mutation in TPRN and progressive hearing loss in a family from Pakistan. *Biochem Genet* 2013; 51: 350-357.
